# Supplementary material for: Efficient production of sugar-derived aldonic acids byPseudomonas fragiTCCC11892
Source: Royal Society of Chemistry journal article supplement (doi:10.1039/c8ra07556e), 2018-01-01
Supplement: c8ra07556e1.pdf [file c8ra07556e1.pdf]

## Supporting Information for the article

- Fig. S1 ESI-MS spectra data of galactonic acid
- Fig. S2  $^1\text{H}$  NMR of galactonic acid and galactose
- Fig. S3  $^{13}\text{C}$  NMR of galactonic acid and galactose
- Fig. S4  $^1\text{H}$  NMR of standard L-rhamnonic acid
- Fig. S5  $^1\text{H}$  NMR of L-rhamnonic acid obtained from biotransformation
- Fig. S6  $^{13}\text{C}$  NMR of standard L-rhamnonic acid
- Fig. S7  $^{13}\text{C}$  NMR of L-rhamnonic acid obtained from biotransformation
- Fig. S8 ESI-MS spectra data of L-rhamnonic acid
- Fig. S9 ESI-MS spectra data of maltobionic acid
- Fig. S10  $^1\text{H}$  NMR of maltobionic acid
- Fig. S11  $^{13}\text{C}$  NMR of maltobionic acid
- Fig. S12 ESI-MS spectra data of lactobionic acid
- Fig. S13  $^1\text{H}$  NMR of standard lactobionic acid
- Fig. S14  $^1\text{H}$  NMR of lactobionic acid obtained from biotransformation
- Fig. S15  $^{13}\text{C}$  NMR of standard lactobionic acid
- Fig. S16  $^{13}\text{C}$  NMR of lactobionic acid obtained from biotransformation
- Fig. S17 ESI-MS spectra data of cellobionic acid
- Fig. S18  $^1\text{H}$  NMR of cellobiose and cellobionic acid
- Fig. S19  $^{13}\text{C}$  NMR of cellobiose and cellobionic acid
- Fig. S20 HPLC profiles of the L-rhamnonic acid obtained from biotransformation
- Fig. S21 HPLC profiles of the maltobionic acid obtained from biotransformation
- Fig. S22 HPLC profiles of the lactobionic acid obtained from biotransformation

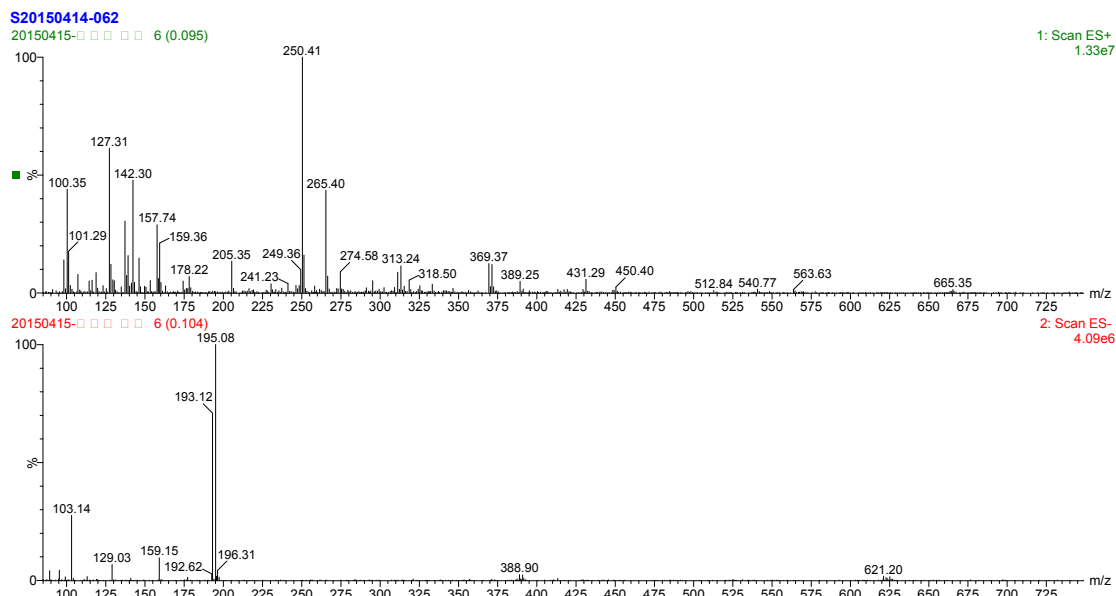

**Fig. S1 ESI-MS spectra data of galactonic acid**

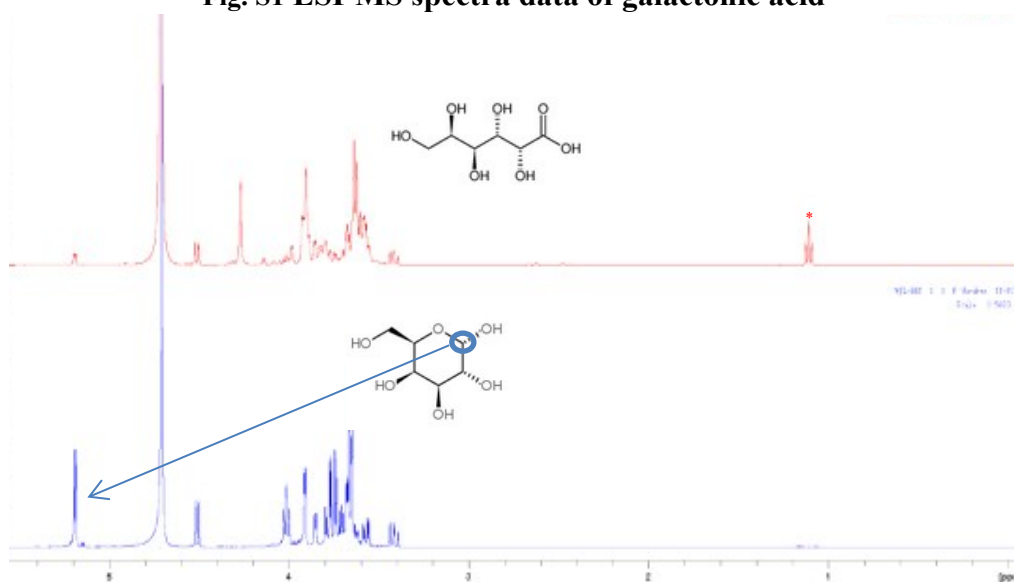

**Fig. S2  $^1\text{H}$  NMR of galactonic acid and galactose**

\* represents the residue ethanol in the product of galactonic acid obtained from biotransformation after precipitated with 95% ethanol, the residue ethanol was still observed from the NMR although the sample was dried in air.

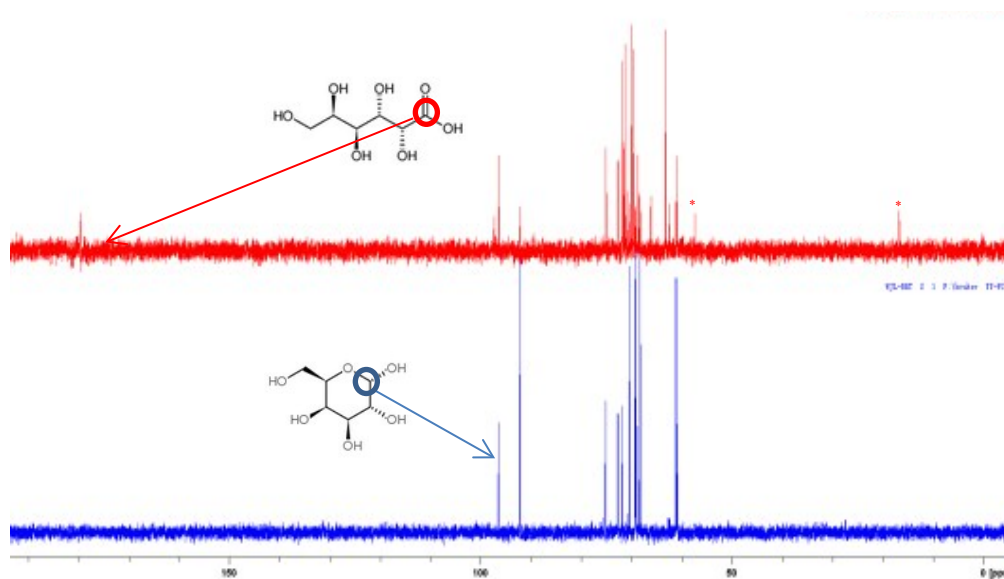

Fig. S3  $^{13}\text{C}$  NMR of galactonic acid and galactose

\* represents the residue ethanol in the product of galactonic acid obtained from biotransformation after precipitated with 95% ethanol and then dried in air.

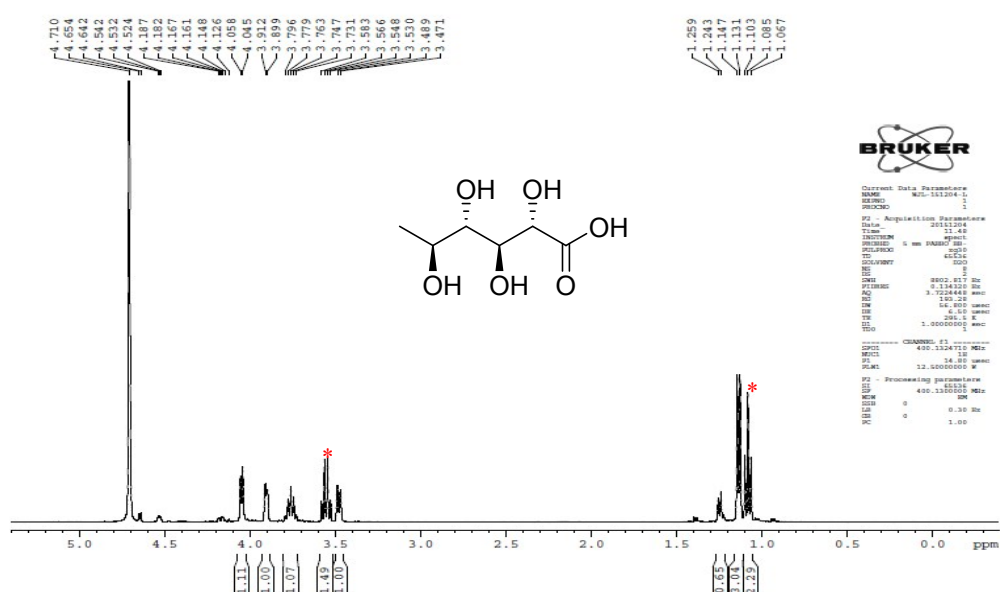

Fig. S4  $^1\text{H}$  NMR of standard L-rhamnonic acid

\* represents the residue ethanol in the standard L-rhamnonic acid bought from Sigma, and the purity of which is  $\geq 90\%$  (HPLC)

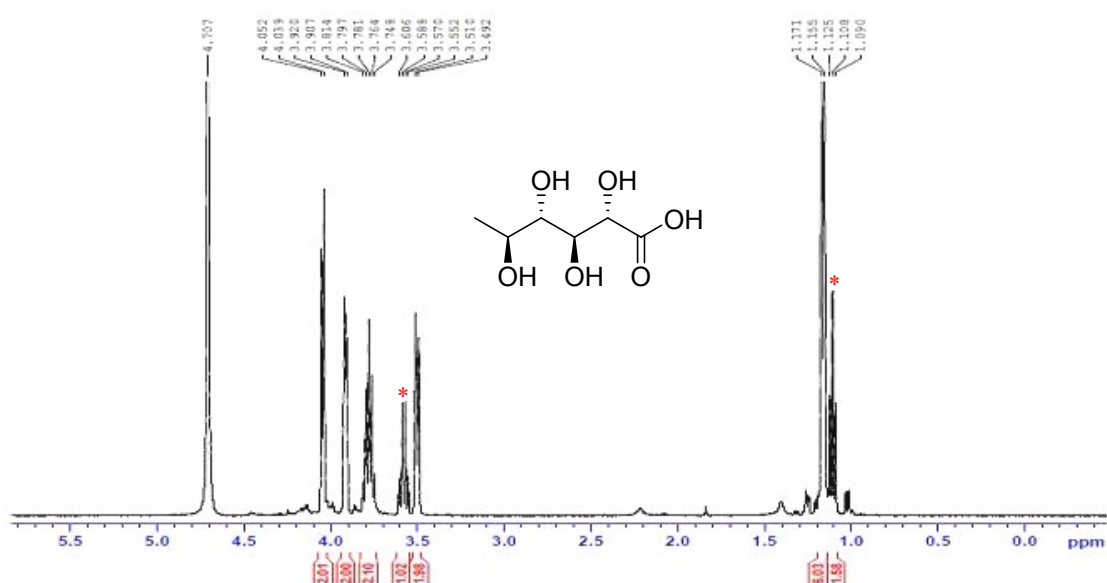

**Fig. S5  $^1\text{H}$  NMR of L-rhamnonic acid obtained from biotransformation**

\* represents the residue ethanol in the product of L-rhamnonic acid obtained from biotransformation after precipitated with 95% ethanol and then dried in air.

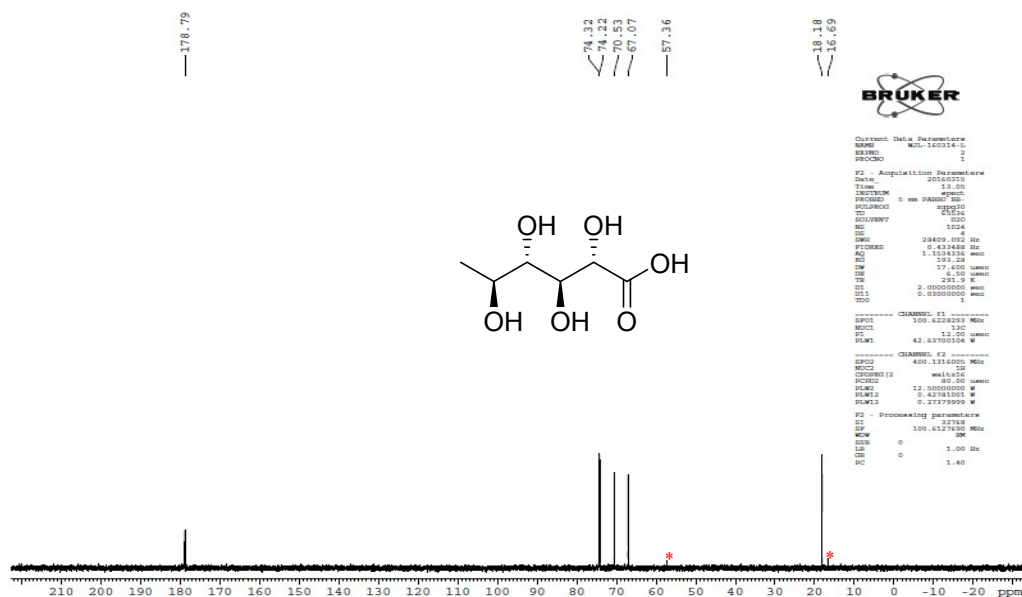

**Fig. S6  $^{13}\text{C}$  NMR of standard L-rhamnonic acid**

\* represents the residue ethanol in the standard L-rhamnonic acid bought from Sigma, and the purity of which is  $\geq 90\%$  (HPLC)

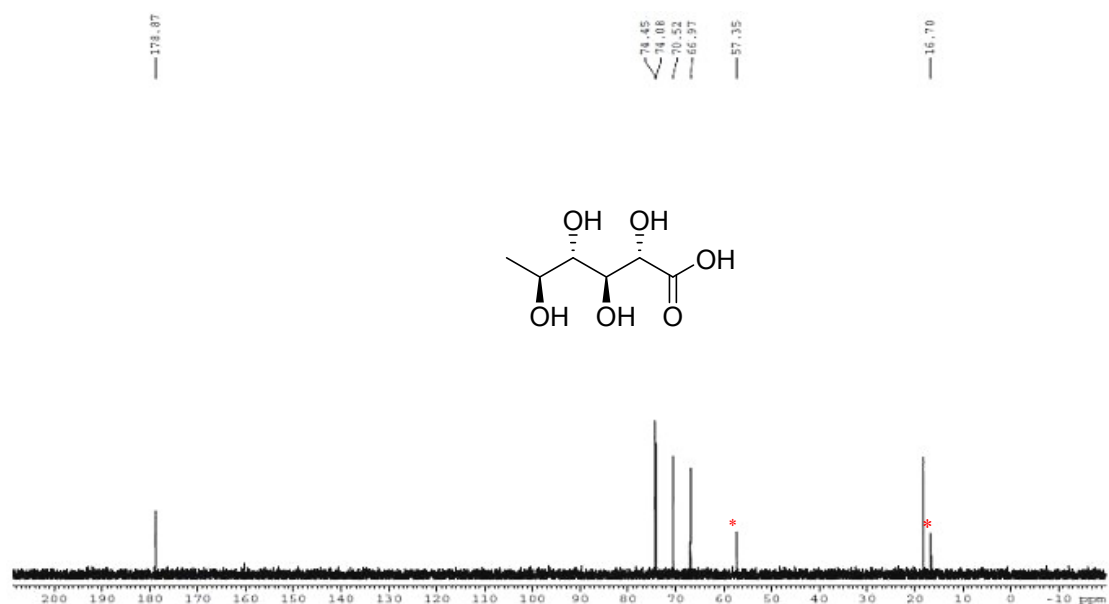

Fig. S7 <sup>13</sup>C NMR of L-rhamnonic acid obtained from biotransformation

\* represents the residue ethanol in the product of L-rhamnonic acid obtained from biotransformation after precipitated with 95% ethanol and then dried in air.

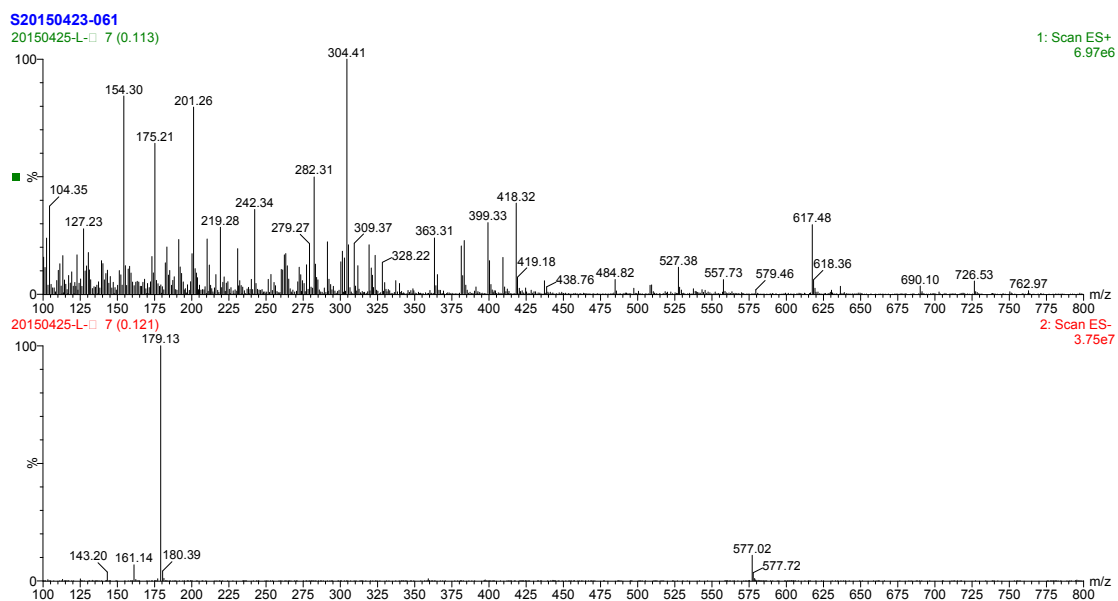

Fig. S8 ESI-MS spectra data of L-rhamnonic acid

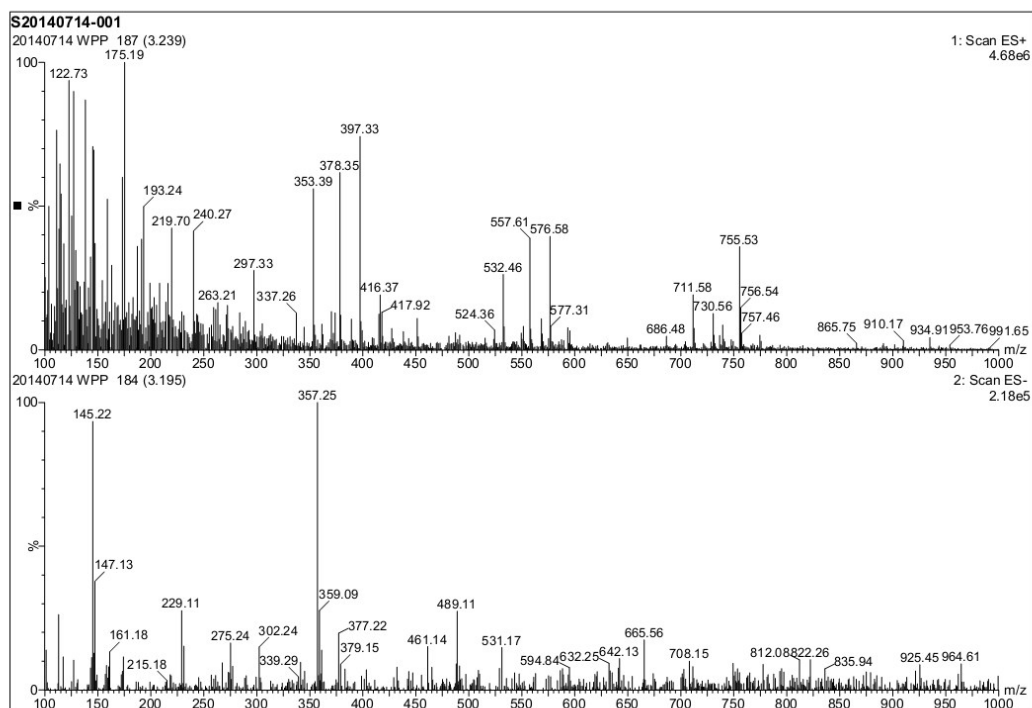

**Fig. S9 ESI-MS spectra data of maltobionic acid**

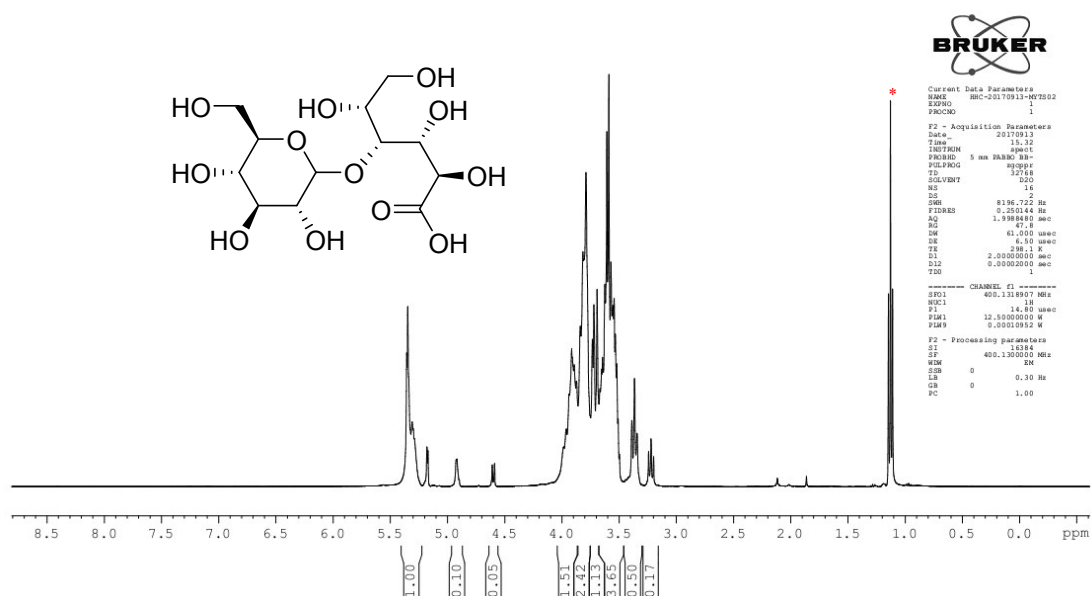

**Fig. S10 <sup>1</sup>H NMR of maltobionic acid**

\* represents the residue ethanol in the product of maltobionic acid obtained from biotransformation after precipitated with 95% ethanol and then dried in air.

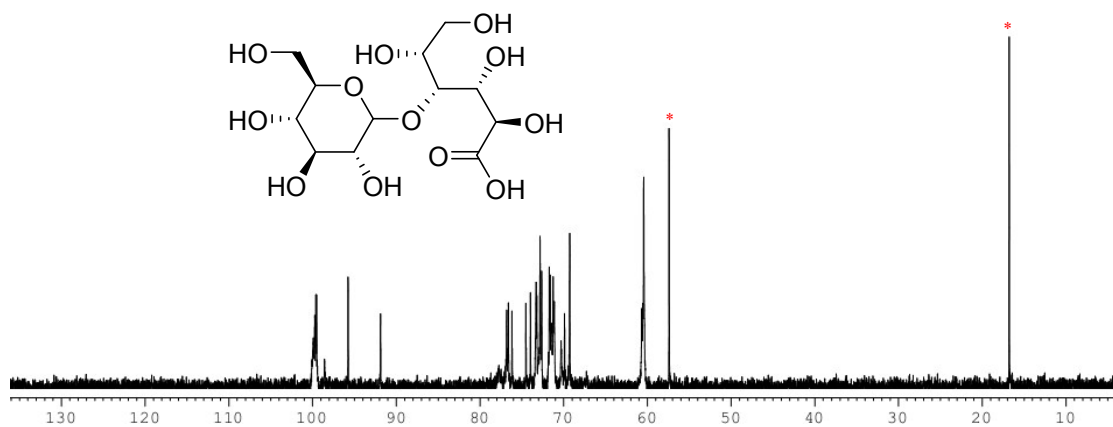

**Fig. S11  $^{13}\text{C}$  NMR of maltobionic acid**

\* represents the residue ethanol in the product of maltobionic acid obtained from biotransformation after precipitated with 95% ethanol and then dried in air.

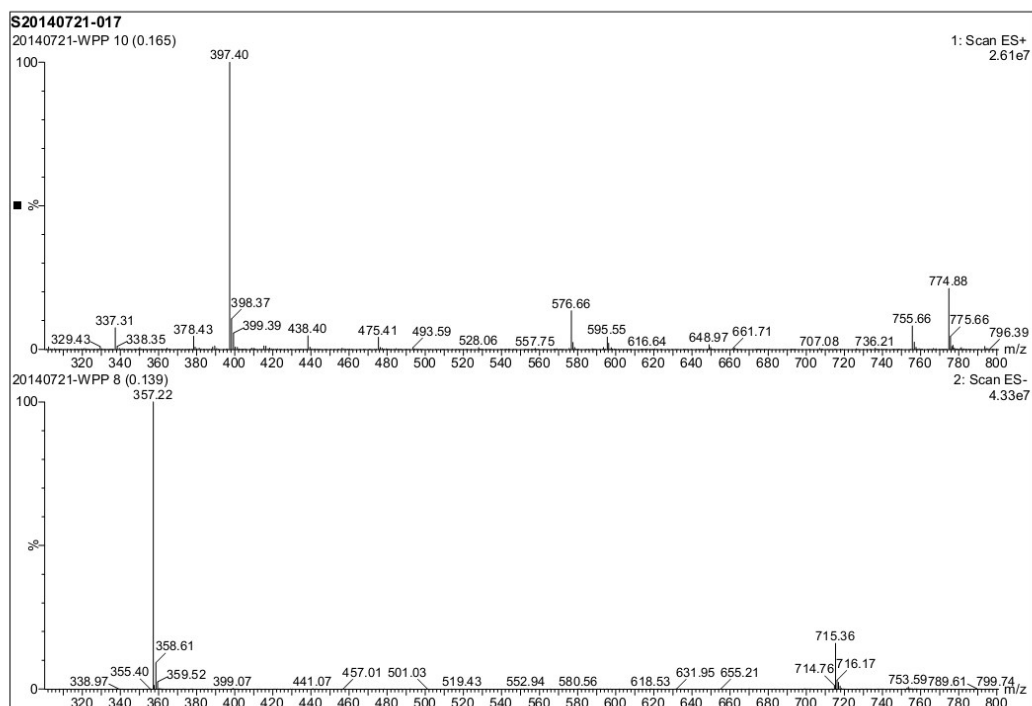

**Fig. S12 ESI-MS spectra data of lactobionic acid**

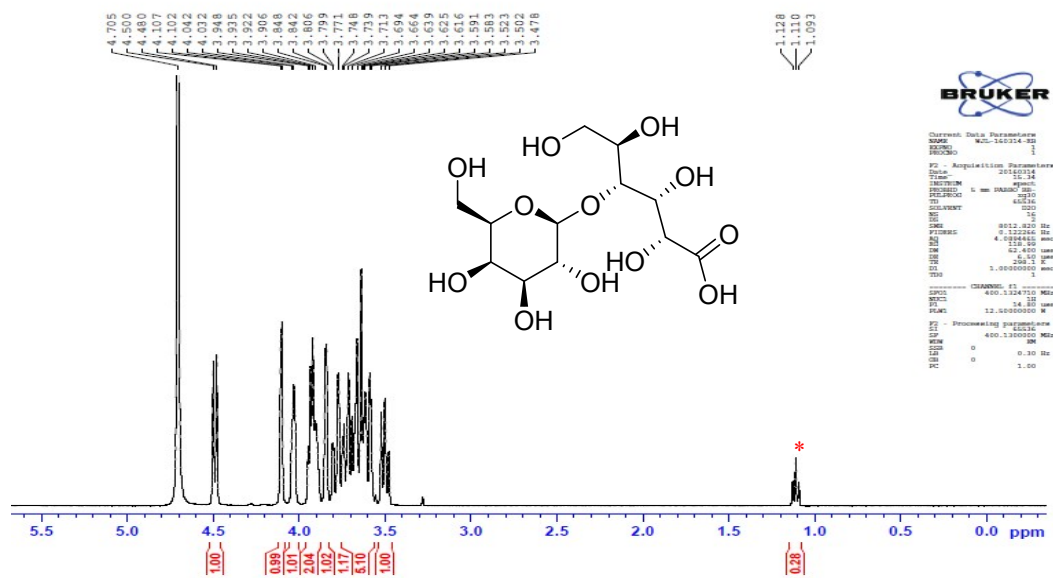

Fig. S13 <sup>1</sup>H NMR of standard lactobonic acid

\* represents the residue ethanol in the standard lactobonic acid bought from Sigma,  
and the purity of which is  $\geq 97\%$  (HPLC)

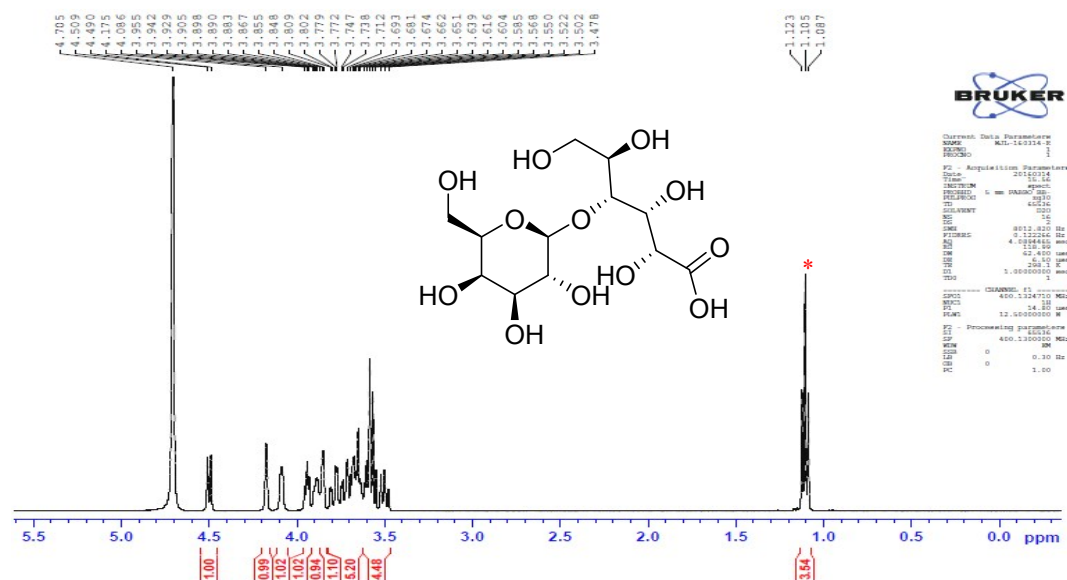

Fig. S14 <sup>1</sup>H NMR of lactobonic acid obtained from biotransformation

\* represents the residue ethanol in the product of lactobonic acid obtained from  
biotransformation after precipitated with 95% ethanol and then dried in air.





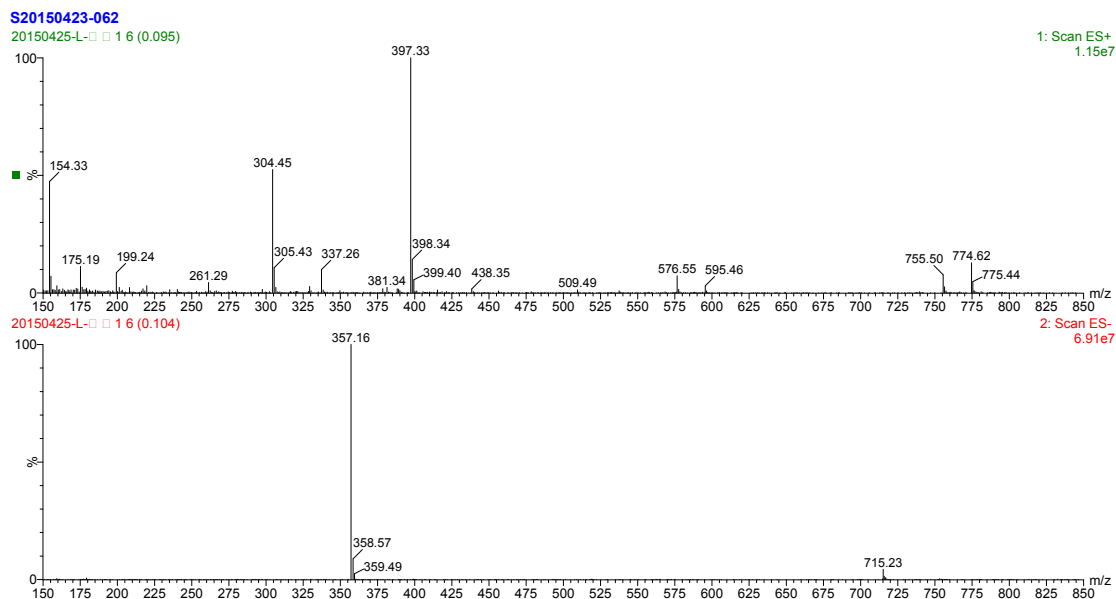

Fig. S17 ESI-MS spectra data of cellobionic acid

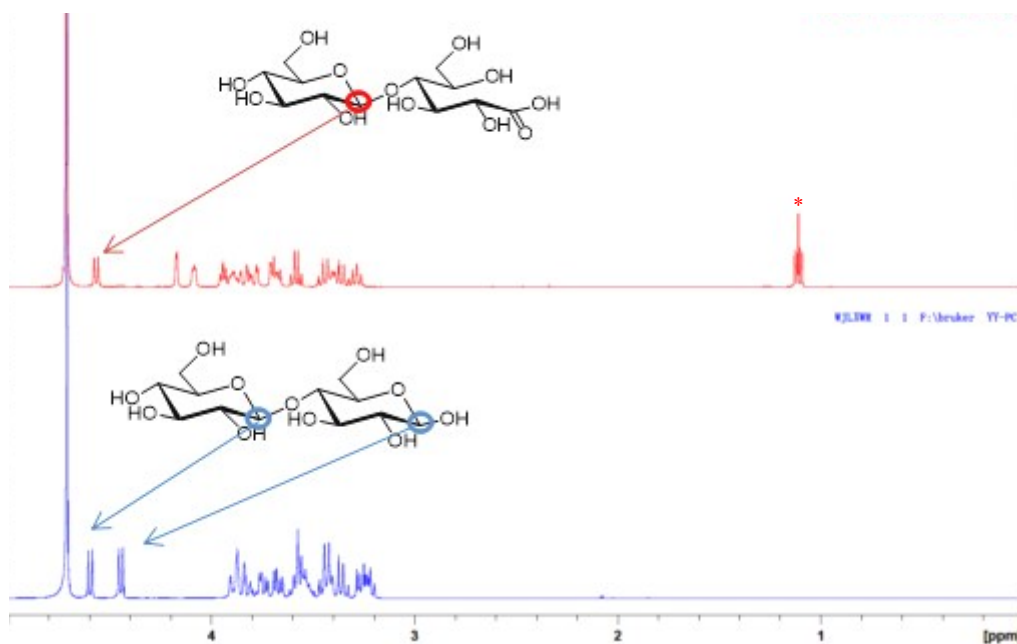

Fig. 18  $^1\text{H}$  NMR of cellobionic acid and cellobiose

\* represents the residue ethanol in the product of cellobionic acid obtained from biotransformation after precipitated with 95% ethanol and then dried in air.

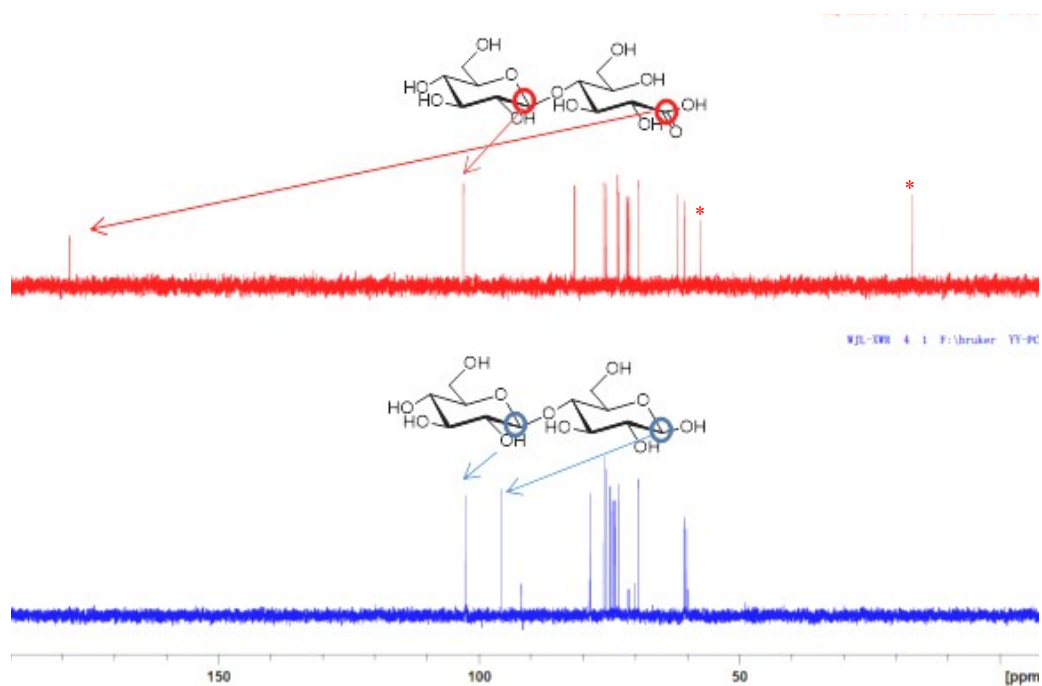

**Fig. S19  $^{13}\text{C}$  NMR of cellobionic acid and cellobiose**

\* represents the residue ethanol in the product of cellobionic acid obtained from biotransformation after precipitated with 95% ethanol and then dried in air.

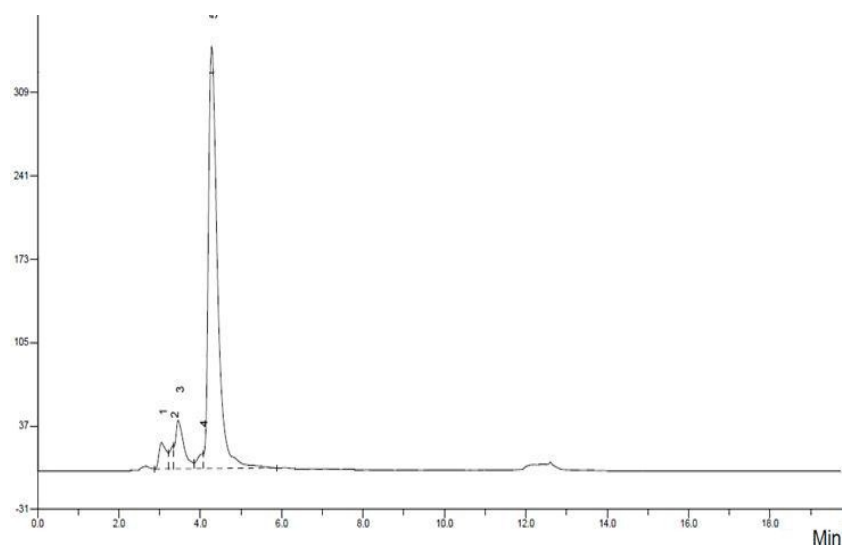

**Fig. S20 HPLC profiles of the L-rhamnonic acid obtained from biotransformation**

The peak appeared at about 4.4 min represents galactonic acid

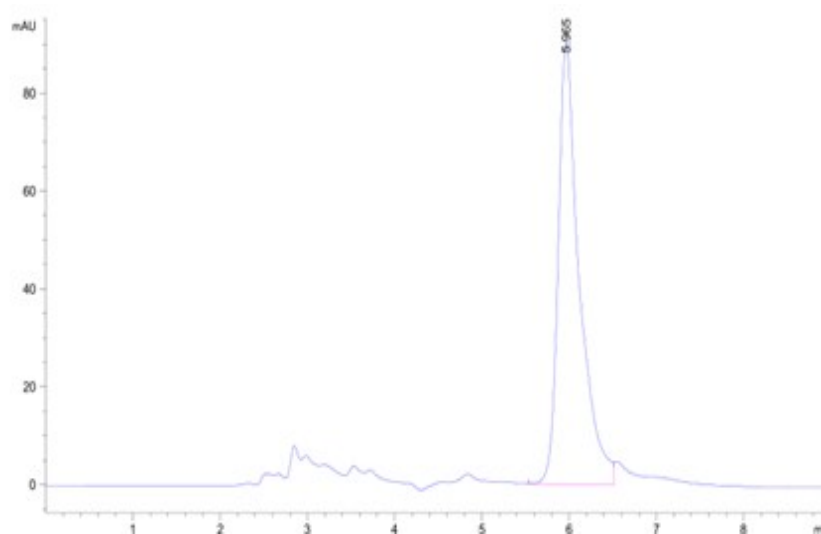

**Fig. S21 HPLC profiles of the maltobionic acid obtained from biotransformation**  
**The peak appeared at about 5.965 min represents maltobionic acid**

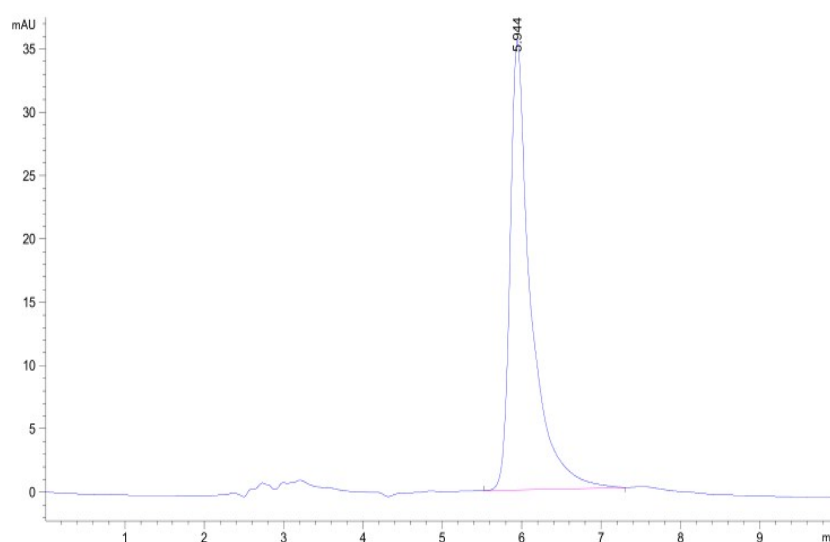

**Fig. S22 HPLC profiles of the lactobionic acid obtained from biotransformation**  
**The peak appeared at about 5.944 min represents lactobionic acid**
